# Supplementary material for: Effects of social housing on alcohol intake in mice depend on the non-social environment
Source: Front Behav Neurosci. 2024 May 16;18:1380031. doi: 10.3389/fnbeh.2024.1380031 (PMC11137225; doi:10.3389/fnbeh.2024.1380031)
Supplement: Supplementary file 1 [file Table_1.XLSX]

## Sheet: Fluid Consumption
Figure	Test	Dependant	Effects	F Statistic	P Value	Significant?
2A	Two-way ANOVA	Ethanol Intake 1-2	Interaction	14.87	0.0004	***
			Sex	0.8263	0.3688	ns
			Social Condition	31.31	<0.0001	****
2A	Tukey's multiple comparisons test		Female:1 vs. Male:4		<0.0001	****
			Female:4 vs. Male:1		0.0262	*
			Female:4 vs. Male:4		0.0068	**
			Male:1 vs. Male:4		<0.0001	****
2B	Two-way ANOVA	Ethanol Intake 3-5	Interaction	1.281	0.2648	ns
			Sex	3.188	0.0822	ns
			Social Condition	32.99	<0.0001	****
2C	Two-way ANOVA	Water Intake 1-2	Interaction	0.06747	0.7964	ns
			Sex	0.2738	0.6037	ns
			Social Condition	2.425	0.1273	ns
2D	Two-way ANOVA	Water Intake 3-5	Interaction	0.02507	0.875	ns
			Sex	1.051	0.3113	ns
			Social Condition	7.543	0.009	**
3A	Two-way ANOVA	Ethanol Intake 1-2	Interaction	0.154	0.6957	ns
			Sex	0.05712	0.8117	ns
			Social Condition	2.322	0.1314	ns
3B	Two-way ANOVA	Ethanol Intake 3-5	Interaction	0.001578	0.9684	ns
			Sex	0.239	0.6262	ns
			Social Condition	2.958	0.0892	ns
3C	Two-way ANOVA	Water Intake 1-2	Interaction	0.2675	0.6064	ns
			Sex	1.054	0.3076	ns
			Social Condition	11.64	0.001	**
3D	Two-way ANOVA	Water Intake 3-5	Interaction	0.1733	0.6783	ns
			Sex	0.4519	0.5033	ns
			Social Condition	22.17	<0.0001	****
3E	Two-way ANOVA	Ethanol Preference 1-2	Interaction	0.1542	0.6955	ns
			Sex	0.2638	0.6089	ns
			Social Condition	6.903	0.0102	*
3F	Two-way ANOVA	Ethanol Preference 3-5	Interaction	0.1242	0.7254	ns
			Sex	0.1058	0.7458	ns
			Social Condition	1.95	0.0009	***
8A	Three-way repeated measures	Ethanol Intake 1-2	Hour	37.25	<0.0001	****
	ANOVA		Sex	0.4065	0.5255	ns
			Social Condition	0.1453	0.704	ns
			Hour x Sex	1.271	0.1746	ns
			Hour x Social Condition	1.846	0.0085	**
			Sex x Social Condition	0.241	0.6247	ns
			Hour x Sex x Social Condition	1.055	0.3909	ns
8B	Three-way repeated measures	Ethanol Intake 3-5	Hour	47.48	<0.0001	****
	ANOVA		Sex	0.02951	0.864	ns
			Social Condition	3.488	0.0653	ns
			Hour x Sex	0.788	0.7501	ns
			Hour x Social Condition	1.426	0.0866	ns
			Sex x Social Condition	0.2111	0.6471	ns
			Hour x Sex x Social Condition	0.6667	0.8814	ns
8C	Three-way repeated measures	Water Intake 1-2	Hour	29	<0.0001	****
	ANOVA		Sex	3.547	0.0631	ns
			Social Condition	10.88	0.0014	**
			Hour x Sex	2.025	0.0028	**
			Hour x Social Condition	4.243	<0.0001	****
			Sex x Social Condition	2.932	0.0905	ns
			Hour x Sex x Social Condition	2.038	0.0025	**
8D	Three-way repeated measures	Water Intake 3-5	Hour	42.81	<0.0001	****
	ANOVA		Sex	1.954	0.1657	ns
			Social Condition	31.38	<0.0001	****
			Hour x Sex	1.698	0.0205	*
			Hour x Social Condition	13.66	<0.0001	****
			Sex x Social Condition	3.01	0.0864	ns
			Hour x Sex x Social Condition	2.011	0.003	**
9A	One-way ANOVA	Ethanol Intake Cage Effects 6%	Group	3.984	0.0001	***
9B	One-way ANOVA	Ethanol Preference Cage Effects 6%	Group	4.768	<0.0001	****

## Sheet: CVs
Figure	Test	Dependant	Effects	F Statistic	P Value	Significant?
4A	Two-way ANOVA	Ethanol CV 1-2	Interaction	2.819	0.097	ns
			Sex	1.451	0.2318	ns
			Social Condition	3.296	0.0731	ns
4B	Two-way ANOVA	Ethanol CV 3-5	Interaction	0.7421	0.3915	ns
			Sex	1.602	0.2093	ns
			Social Condition	5.763	0.0187	*
4C	Two-way ANOVA	Water CV 1-2	Interaction	0.0009269	0.9758	ns
			Sex	2.569	0.1128	ns
			Social Condition	6.266	0.0143	*
4D	Two-way ANOVA	Water CV 3-5	Interaction	0.2055	0.6515	ns
			Sex	2.951	0.0896	ns
			Social Condition	10.38	0.0018	**
4E	Two-way ANOVA	Ethanol CV Preference 1-2	Interaction	2.082	0.1528	ns
			Sex	2.174	0.1441	ns
			Social Condition	3.772	0.0555	ns
4F	Two-way ANOVA	Ethanol CV Preference 3-5	Interaction	0.03048	0.8618	ns
			Sex	1.233	0.2702	ns
			Social Condition	4.761	0.032	*
5A	Two-way ANOVA	Ethanol CV time 1-2	Interaction	7.36	0.0081	**
			Sex	4.007	0.0487	*
			Social Condition	2.37	0.1276	ns
5A	Tukey's multiple comparisons test		Female:4 vs. Male:4		<0.0001	****
			Male:1 vs. Male:4		0.0229	*
5B	Two-way ANOVA	Ethanol CV time 3-5	Interaction	1.313	0.2553	ns
			Sex	4.406	0.039	*
			Social Condition	3.238	0.0757	*
5C	Two-way ANOVA	Water CV time 1-2	Interaction	0.1837	0.6693	ns
			Sex	0.08068	0.7771	ns
			Social Condition	4.224	0.043	*
5D	Two-way ANOVA	Water CV time 3-5	Interaction	0.7529	0.3881	ns
			Sex	0.2266	0.6353	ns
			Social Condition	4.409	0.0388	*
5E	Two-way ANOVA	Ethanol CV time Preference 1-2	Interaction	2.24	0.1383	ns
			Sex	1.644	0.2034	ns
			Social Condition	2.574	0.1124	ns
5F	Two-way ANOVA	Ethanol CV time Preference 3-5	Interaction	0.01011	0.9201	ns
			Sex	1.344	0.2497	ns
			Social Condition	3.923	0.0509	ns

## Sheet: NNVs
Figure	Test	Dependant	Effects	F Statistic	P Value	Significant?
6A	Two-way ANOVA	Ethanol NNV 1-2	Interaction	0.2312	0.6319	ns
			Sex	5.697	0.0193	*
			Social Condition	12.12	0.0008	***
6A	Tukey's multiple comparisons test		Female:1 vs. Female:4		0.0297	*
			Female:1 vs. Male:4		0.0005	***
6B	Two-way ANOVA	Ethanol NNV 3-5	Interaction	0.5115	0.4765	ns
			Sex	5.626	0.02	*
			Social Condition	29.79	<0.0001	****
6B	Tukey's multiple comparisons test		Female:1 vs. Female:4		0.0002	***
			Female:1 vs. Male:4		<0.0001	****
			Male:1 vs. Male:4		0.006	**
6C	Two-way ANOVA	Water NNV 1-2	Interaction	4.687	0.0333	*
			Sex	2.103	0.1508	ns
			Social Condition	1.347	0.2492	ns
6C	Tukey's multiple comparisons test		Female:4 vs. Male:4		0.0034	**
6D	Two-way ANOVA	Water NNV 3-5	Interaction	0.06147	0.8048	ns
			Sex	5.348	0.0233	*
			Social Condition	6.41	0.0133	*
6D	Tukey's multiple comparisons test		Female:1 vs. Male:4		0.0049	**
6E	Two-way ANOVA	Ethanol NNV Preference 1-2	Interaction	0.9558	0.3311	ns
			Sex	0.3744	0.5423	ns
			Social Condition	1.358	0.2472	ns
6F	Two-way ANOVA	Ethanol NNV Preference 3-5	Interaction	0.9156	0.3414	ns
			Sex	0.4706	0.4946	ns
			Social Condition	1.442	0.2332	ns
7A	Two-way ANOVA	Ethanol NNV time 1-2	Interaction	0.1781	0.6741	ns
			Sex	4.681	0.0334	*
			Social Condition	2.852	0.0951	ns
7B	Two-way ANOVA	Ethanol NNV time 3-5	Interaction	0.04699	0.8289	ns
			Sex	3.239	0.0756	ns
			Social Condition	14.14	0.0003	***
7C	Two-way ANOVA	Water NNV time 1-2	Interaction	5.141	0.026	*
			Sex	1.554	0.2161	ns
			Social Condition	0.5702	0.4523	ns
7C	Tukey's multiple comparisons test		Female:4 vs. Male:4		0.0043	**
7D	Two-way ANOVA	Water NNV time 3-5	Interaction	2.707	0.1037	ns
			Sex	0.8752	0.3522	ns
			Social Condition	0.9109	0.3426	ns
7E	Two-way ANOVA	Ethanol NNV time Preference 1-2	Interaction	1.312	0.2553	ns
			Sex	0.5995	0.441	ns
			Social Condition	2.003	0.1607	ns
7F	Two-way ANOVA	Ethanol NNV time Preference 3-5	Interaction	0.7909	0.3764	ns
			Sex	0.7151	0.4002	ns
			Social Condition	1.831	0.1797	ns
